# Supplementary material for: Evaluating the utility of brightfield image data for mechanism of action prediction
Source: PubMed Central journal article supplement (PMC10403126; doi:10.1371/journal.pcbi.1011323), 2023-07-25
Supplement: pcbi.1011323.s010.pdf [file pcbi.1011323.s010.pdf]

## Evaluating the utility of brightfield image data for mechanism of action prediction

**Table S1.** Comparison of the results for three model runs with different seeds when DMSO plate-level normalization was applied to the data.

(a) Mean and standard deviation of the Macro-F1 scores on the test sets for the five data splits.

|         | BF <sub>dms0</sub> | FL <sub>dms0</sub> |
|---------|--------------------|--------------------|
| Split 1 | 0.734±0.005        | <b>0.765±0.009</b> |
| Split 2 | <b>0.819±0.004</b> | 0.807±0.006        |
| Split 3 | 0.723±0.001        | <b>0.782±0.008</b> |
| Split 4 | 0.689±0.015        | <b>0.744±0.008</b> |
| Split 5 | 0.720±0.009        | <b>0.743±0.020</b> |

(b) Mean and standard deviation of the F1 scores per MoA on the test sets.

|               | BF <sub>dms0</sub> | FL <sub>dms0</sub> |
|---------------|--------------------|--------------------|
| ATPase-i      | 0.622±0.012        | <b>0.728±0.020</b> |
| AuroraK-i     | 0.681±0.002        | <b>0.711±0.028</b> |
| HDAC-i        | 0.753±0.003        | <b>0.786±0.011</b> |
| HSP-i         | <b>0.741±0.009</b> | 0.720±0.011        |
| JAK-i         | 0.662±0.010        | <b>0.668±0.010</b> |
| PARP-i        | 0.889±0.005        | <b>0.905±0.014</b> |
| Prot.Synth.-i | 0.682±0.021        | <b>0.772±0.015</b> |
| Ret.Rec.Ag    | 0.743±0.005        | <b>0.764±0.004</b> |
| Topo.-i       | <b>0.755±0.020</b> | 0.719±0.007        |
| Tub.Pol.-i    | <b>0.882±0.005</b> | 0.857±0.003        |
| DMSO          | 0.773±0.013        | <b>0.867±0.006</b> |
| Macro average | 0.744±0.005        | <b>0.772±0.005</b> |
