# Supplementary material for: Evaluating the utility of brightfield image data for mechanism of action prediction
Source: PubMed Central journal article supplement (PMC10403126; doi:10.1371/journal.pcbi.1011323), 2023-07-25
Supplement: pcbi.1011323.s011.pdf [file pcbi.1011323.s011.pdf]

## Evaluating the utility of brightfield image data for mechanism of action prediction

**Table S2.** Comparison of the results for three model runs with different seeds when site-level normalization was applied to the data.

(a) Mean and standard deviation of the Macro-F1 scores on the test sets for the five data splits.

|         | BF <sub>site</sub> | FL <sub>site</sub> |
|---------|--------------------|--------------------|
| Split 1 | 0.661±0.004        | <b>0.644±0.022</b> |
| Split 2 | <b>0.772±0.003</b> | 0.750±0.010        |
| Split 3 | 0.657±0.002        | <b>0.668±0.007</b> |
| Split 4 | <b>0.673±0.006</b> | 0.650±0.008        |
| Split 5 | <b>0.706±0.004</b> | 0.691±0.002        |

(b) Mean and standard deviation of the F1 scores per MoA on the test sets.

|               | BF <sub>site</sub> | FL <sub>site</sub> |
|---------------|--------------------|--------------------|
| ATPase-i      | 0.657±0.007        | <b>0.677±0.004</b> |
| AuroraK-i     | <b>0.714±0.001</b> | 0.667±0.003        |
| HDAC-i        | 0.766±0.002        | <b>0.786±0.003</b> |
| HSP-i         | <b>0.751±0.004</b> | 0.692±0.008        |
| JAK-i         | 0.378±0.025        | <b>0.407±0.022</b> |
| PARP-i        | <b>0.781±0.007</b> | 0.735±0.012        |
| Prot.Synth.-i | 0.517±0.008        | <b>0.634±0.010</b> |
| Ret.Rec.Ag    | 0.785±0.013        | <b>0.791±0.016</b> |
| Topo.-i       | <b>0.687±0.011</b> | 0.643±0.007        |
| Tub.Pol.-i    | 0.858±0.006        | <b>0.874±0.006</b> |
| DMSO          | <b>0.846±0.007</b> | 0.684±0.007        |
| Macro average | <b>0.704±0.001</b> | 0.690±0.005        |
