# Supplementary material for: Evaluating the utility of brightfield image data for mechanism of action prediction
Source: PubMed Central journal article supplement (PMC10403126; doi:10.1371/journal.pcbi.1011323), 2023-07-25
Supplement: pcbi.1011323.s012.pdf [file pcbi.1011323.s012.pdf]

## Evaluating the utility of brightfield image data for mechanism of action prediction

**Table S3.** Comparison of the test set F1 scores for three different architectures trained on BF and FL when DMSO plate-level normalization was applied to the data.

(a) Macro-F1 scores on the test sets for the five data splits.

|         | ResNet-50          |                    | DenseNet-169       |                    | EfficientNet-B3    |                    |
|---------|--------------------|--------------------|--------------------|--------------------|--------------------|--------------------|
|         | BF <sub>dms0</sub> | FL <sub>dms0</sub> | BF <sub>dms0</sub> | FL <sub>dms0</sub> | BF <sub>dms0</sub> | FL <sub>dms0</sub> |
| Split 1 | 0.738              | <b>0.777</b>       | 0.726              | 0.768              | 0.749              | 0.758              |
| Split 2 | 0.821              | 0.799              | 0.806              | 0.820              | 0.661              | <b>0.836</b>       |
| Split 3 | 0.724              | 0.793              | 0.710              | 0.760              | 0.301              | <b>0.800</b>       |
| Split 4 | 0.710              | 0.738              | 0.697              | 0.744              | 0.296              | <b>0.785</b>       |
| Split 5 | 0.728              | 0.716              | 0.711              | 0.755              | 0.436              | <b>0.773</b>       |

(b) F1 scores per MoA on the test sets.

|               | ResNet-50          |                    | DenseNet-169       |                    | EfficientNet-B3    |                    |
|---------------|--------------------|--------------------|--------------------|--------------------|--------------------|--------------------|
|               | BF <sub>dms0</sub> | FL <sub>dms0</sub> | BF <sub>dms0</sub> | FL <sub>dms0</sub> | BF <sub>dms0</sub> | FL <sub>dms0</sub> |
| ATPase-i      | 0.605              | 0.701              | 0.591              | 0.719              | 0.398              | <b>0.746</b>       |
| AuroraK-i     | 0.683              | 0.675              | 0.663              | 0.708              | 0.538              | <b>0.731</b>       |
| HDAC-i        | 0.756              | 0.773              | 0.769              | 0.789              | 0.675              | <b>0.797</b>       |
| HSP-i         | 0.738              | 0.730              | <b>0.743</b>       | 0.708              | 0.619              | 0.726              |
| JAK-i         | 0.675              | 0.653              | 0.655              | 0.666              | 0.436              | <b>0.698</b>       |
| PARP-i        | 0.895              | 0.886              | 0.884              | 0.902              | 0.551              | <b>0.935</b>       |
| Prot.Synth.-i | 0.711              | 0.793              | 0.701              | 0.778              | 0.296              | <b>0.800</b>       |
| Ret.Rec.Ag    | 0.740              | 0.769              | 0.744              | 0.776              | 0.510              | <b>0.800</b>       |
| Topo.-i       | <b>0.780</b>       | 0.728              | 0.747              | 0.722              | 0.450              | 0.739              |
| Tub.Pol.-i    | <b>0.887</b>       | 0.854              | 0.847              | 0.868              | 0.735              | 0.843              |
| DMSO          | 0.790              | 0.866              | 0.750              | 0.883              | 0.482              | <b>0.897</b>       |
| Macro average | 0.751              | 0.766              | 0.736              | 0.774              | 0.517              | <b>0.792</b>       |
