# Supplementary material for: Evaluating the utility of brightfield image data for mechanism of action prediction
Source: PubMed Central journal article supplement (PMC10403126; doi:10.1371/journal.pcbi.1011323), 2023-07-25
Supplement: pcbi.1011323.s013.pdf [file pcbi.1011323.s013.pdf]

## Evaluating the utility of brightfield image data for mechanism of action prediction

**Table S4.** Comparison of the test set F1 scores for three different architectures trained on BF and FL when site-level normalization was applied to the data.

(a) Macro-F1 scores on the test sets for the five data splits.

|         | ResNet-50          |                    | DenseNet-169       |                    | EfficientNet-B3    |                    |
|---------|--------------------|--------------------|--------------------|--------------------|--------------------|--------------------|
|         | BF <sub>site</sub> | FL <sub>site</sub> | BF <sub>site</sub> | FL <sub>site</sub> | BF <sub>site</sub> | FL <sub>site</sub> |
| Split 1 | 0.662              | 0.661              | <b>0.677</b>       | 0.655              | 0.638              | 0.665              |
| Split 2 | 0.770              | 0.762              | 0.776              | 0.742              | 0.757              | <b>0.776</b>       |
| Split 3 | 0.654              | 0.677              | 0.647              | 0.654              | 0.630              | <b>0.705</b>       |
| Split 4 | <b>0.676</b>       | 0.645              | 0.638              | 0.604              | 0.625              | 0.641              |
| Split 5 | 0.708              | 0.688              | 0.690              | 0.687              | 0.595              | <b>0.708</b>       |

(b) F1 scores per MoA on the test sets.

|               | ResNet-50          |                    | DenseNet-169       |                    | EfficientNet-B3    |                    |
|---------------|--------------------|--------------------|--------------------|--------------------|--------------------|--------------------|
|               | BF <sub>site</sub> | FL <sub>site</sub> | BF <sub>site</sub> | FL <sub>site</sub> | BF <sub>site</sub> | FL <sub>site</sub> |
| ATPase-i      | 0.650              | 0.683              | 0.622              | 0.648              | 0.585              | <b>0.702</b>       |
| AuroraK-i     | 0.713              | 0.671              | 0.693              | 0.644              | <b>0.724</b>       | 0.667              |
| HDAC-i        | 0.766              | 0.785              | 0.749              | 0.785              | 0.760              | <b>0.819</b>       |
| HSP-i         | 0.756              | 0.682              | <b>0.767</b>       | 0.689              | 0.748              | 0.686              |
| JAK-i         | 0.405              | 0.429              | 0.345              | 0.369              | 0.255              | <b>0.444</b>       |
| PARP-i        | 0.789              | 0.748              | <b>0.797</b>       | 0.734              | 0.756              | 0.789              |
| Prot.Synth.-i | 0.520              | 0.646              | 0.543              | 0.647              | 0.455              | <b>0.668</b>       |
| Ret.Rec.Ag    | 0.767              | 0.796              | 0.790              | 0.798              | 0.683              | <b>0.822</b>       |
| Topo.-i       | <b>0.702</b>       | 0.651              | 0.676              | 0.616              | 0.626              | 0.600              |
| Tub.Pol.-i    | 0.850              | <b>0.865</b>       | 0.856              | 0.859              | 0.827              | 0.818              |
| DMSO          | <b>0.836</b>       | 0.691              | 0.801              | 0.685              | 0.732              | 0.791              |
| Macro average | 0.705              | 0.695              | 0.695              | 0.679              | 0.650              | <b>0.710</b>       |
